# Supplementary material for: Insulin-Producing Cells Regulate the Sexual Receptivity through the Painless TRP Channel in Drosophila Virgin Females
Source: PubMed Central journal article supplement (PMC3913769; doi:10.1371/journal.pone.0088175), 2014-02-04

# Supplemental Figure 5

**A**

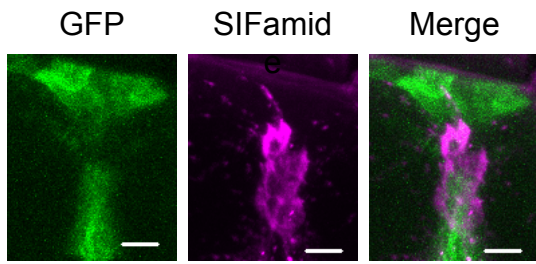

**B**

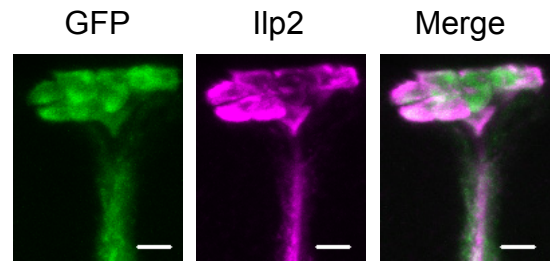

Supplement: pone.0088175.s005.pdf [file pone.0088175.s005.pdf]
