# Supplementary material for: Insulin-Producing Cells Regulate the Sexual Receptivity through the Painless TRP Channel in Drosophila Virgin Females
Source: PubMed Central journal article supplement (PMC3913769; doi:10.1371/journal.pone.0088175), 2014-02-04
Supplement: pone.0088175.s009.pdf [file pone.0088175.s009.pdf]

## Supplemental Table 1

Table S1. List of real time qRT-PCR primers

| Gene name                     | Forward primer          | Reverse primer          |
|-------------------------------|-------------------------|-------------------------|
| <i>pain</i> [primer pair (1)] | CACTCTCAACACCAGGTTGTC   | AGGTTTCCTGGATCCCTAGAG   |
| <i>pain</i> [primer pair (2)] | GTTCAACCTTTTGAACGGTCTTG | TAAGGACGTTGGTTCTGCAAATG |
| <i>rp49</i>                   | AAGATCGTGAAGAAGCGCAC    | TGTGCACCAGGAACTTCTTG    |
