# Supplementary material for: Insulin-Producing Cells Regulate the Sexual Receptivity through the Painless TRP Channel in Drosophila Virgin Females
Source: PubMed Central journal article supplement (PMC3913769; doi:10.1371/journal.pone.0088175), 2014-02-04
Supplement: pone.0088175.s010.pdf [file pone.0088175.s010.pdf]

## Supplemental Table 2

Table S2. Pairwise comparisons of mating success rate

| GAL4 lines                | F <sub>1</sub> vs. GAL4/+ |           | F <sub>1</sub> vs. <i>pain</i> RNAi/+ |           | GAL4/+ vs. <i>pain</i> RNAi/+ |          |
|---------------------------|---------------------------|-----------|---------------------------------------|-----------|-------------------------------|----------|
|                           | $\chi^2$                  | <i>P</i>  | $\chi^2$                              | <i>P</i>  | $\chi^2$                      | <i>P</i> |
| (1) <i>Ilp2</i> -GAL4-II  | 4.939                     | 0.026*    | 12.554                                | <0.001*** | 2.739                         | 0.098    |
| (2) <i>Ilp2</i> -GAL4-III | 14.993                    | <0.001*** | 18.502                                | <0.001*** | <0.001                        | 0.993    |
| (3) MB247                 | 0.395                     | 0.530     | 0.023                                 | 0.880     | 0.213                         | 0.644    |
| (4) 30Y                   | 0.013                     | 0.909     | 1.664                                 | 0.197     | 1.291                         | 0.256    |
| (5) c41                   | 0.358                     | 0.550     | 1.268                                 | 0.260     | 3.321                         | 0.068    |
| (6) c232                  | 0.130                     | 0.719     | 0.700                                 | 0.403     | 0.258                         | 0.612    |
